# Supplementary material
Source: Copernicus journal article supplement (doi:10.5194/cp-22-1255-2026)
Supplement: Supplementary file 1 [file cp-22-1255-2026-supplement.pdf]

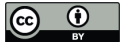

*Supplement of*

## **Climate variability in Poland (Central Europe) in the 16th century based on multiproxy data**

**Rajmund Przybylak et al.**

*Correspondence to:* Rajmund Przybylak (rp11@umk.pl) and Aleksandra Pospieszńska (opos@umk.pl)

The copyright of individual parts of the supplement might differ from the article licence.

1 Table S1. Number of weather notes/excerpts for Poland available in historical sources describing weather in seasons,  
 2 1501–1600

| Decade                 | DJF        | MAM        | JJA        | SON        | Season unknown | Yearly number of excerpts |
|------------------------|------------|------------|------------|------------|----------------|---------------------------|
| 1501-1510              | 13         | 22         | 33         | 20         | 16             | 91                        |
| 1511-1520              | 34         | 14         | 31         | 24         | 19             | 108                       |
| 1521-1530              | 14         | 30         | 36         | 9          | 6              | 69                        |
| 1531-1540              | 32         | 30         | 55         | 22         | 12             | 143                       |
| 1541-1550              | 21         | 17         | 35         | 10         | 13             | 82                        |
| 1551-1560              | 27         | 26         | 28         | 9          | 14             | 91                        |
| 1561-1570              | 26         | 23         | 58         | 17         | 24             | 138                       |
| 1571-1580              | 20         | 18         | 32         | 13         | 15             | 81                        |
| 1581-1590              | 13         | 17         | 31         | 18         | 11             | 75                        |
| 1591-1600              | 7          | 13         | 45         | 6          | 10             | 79                        |
| <b>Total 1501-1600</b> | <b>207</b> | <b>210</b> | <b>384</b> | <b>148</b> | <b>140</b>     | <b>957</b>                |

3  
 4  
 5 Table S2. Examples of documentary sources describing the extreme weather and its impact on farming/crops and the  
 6 environment (drought, sea and river ice).

| Year    | Description                                                                                                                                                                                                                                              | Translation                                                                                                                                                                                                                                                                               | Source                                                                                                          |
|---------|----------------------------------------------------------------------------------------------------------------------------------------------------------------------------------------------------------------------------------------------------------|-------------------------------------------------------------------------------------------------------------------------------------------------------------------------------------------------------------------------------------------------------------------------------------------|-----------------------------------------------------------------------------------------------------------------|
| 1556/57 | <i>Hoc anno in fine et in principio sequentis hiems fuit valde constans, nives et gelua magna incipiendo a festo fere S. S. Hedvigis usque ad Annuntiationem B. Mariae V. 1557 anni per totum fere Martium usque ad finem glacies fuerunt.</i>           | This year, at the end of the year and at the beginning of the following winter, there was very constant snow and frost, beginning almost from the feast of St. Hedwig until the Annunciation of the Blessed Virgin Mary. V. In 1557, there was ice almost throughout March until the end. | Ż e g o t a — Manuscript No. 5358, Library of the Jagiellonian University, Kraków.                              |
| 1564/65 | <i>Zu Breslau und anderswo war abermal ein sehr harter, kalter Winter dass alle schiffreichen Wasser, als der Rhein, Donau, Main, ... und auch die Oder dermassen überfrozen, dass, man in allen Orten mit geladenen Wagen darüber fahren können ...</i> | In Breslau and elsewhere, there was once again a very harsh, cold winter, so that all navigable waterways, such as the Rhine, Danube, Main, and also the Oder, froze over so completely that one could not drive across them with loaded wagons in any of the                             | Pol N., Jahrbücher der Stadt Breslau. Edidit J. G. B ü s c h i n g. I. — V. Bde. (965—1623). Breslau 1811—1827. |

|         |                                                                                                                                                                                                                                                                                                                                                                                                     |                                                                                                                                                                                                                                                                                                                                                                                            |                                                                                                                                |
|---------|-----------------------------------------------------------------------------------------------------------------------------------------------------------------------------------------------------------------------------------------------------------------------------------------------------------------------------------------------------------------------------------------------------|--------------------------------------------------------------------------------------------------------------------------------------------------------------------------------------------------------------------------------------------------------------------------------------------------------------------------------------------------------------------------------------------|--------------------------------------------------------------------------------------------------------------------------------|
|         | <i>Dieser Kalte langwierige Winter hat angefangen um Martini des vorgehenden Jahres, und hat gawähret bis auf Mathiä, vier ganzer Monat.</i>                                                                                                                                                                                                                                                        | places... This cold, long winter began around Martinmas of the previous year and lasted until St. Matthias' Day, four whole months.                                                                                                                                                                                                                                                        |                                                                                                                                |
| 1568/69 | <i>Sehr starke Kälte. Man fährt auf dem Eise nach Heia und Lübeck.</i>                                                                                                                                                                                                                                                                                                                              | Extremely cold. One travels on ice to Hel and Lübeck.                                                                                                                                                                                                                                                                                                                                      | Violet A. F.,<br>Neringia oder<br>Geschichte der<br>Danziger Nehrung.<br>Danzig 1864.                                          |
| 1590    | <i>Ist ein sehr heisser truckener Sommer gewesen, also, dass auch die Landflüsse, als der Bober, Queiss, Katzbach, Weida, Olau, Lohe, und andere mehr gänzlich ausgetrucknet. Die Oder ist auch so klein worden, dass man sie an allen Orten durchwatten können.</i>                                                                                                                                | The summer was so hot [and] dry that regional rivers like the Bóbr, the Kwisa, the Kaczawa, the Widawa, the Oława, the Ślęza [Silesia, auth. suppl.] and many others dried up completely. The Odra also became very shallow, so you could cross it anywhere.                                                                                                                               | Pol N., Jahrbücher<br>der Stadt Breslau.<br>Edidit J. G. B ü s c h<br>i n g. I. — V. Bde.<br>(965—1623).<br>Breslau 1811—1827. |
| 1595    | <i>Eodem anno [1595] hyems acris erat et nivida unde resolutio postea ex nimio calore solis lignefactum gelu feria 4ta hebdomadae magna tanta damna civibus patraverat Bidgost. patraverat hora 9 ante meridiem, talis repentinus casus cives turbarat q[uo]d dato pulso campanae omnes cives cogebantur ad defensionem granariorum frumentis impletarum adesse, t[a]m[e]n in aliquot granarijs</i> | In the same year [1595], the winter was severe and snowy, from which the resolution later, due to the excessive heat of the sun, the frost on the 4th of the Great Week, caused such great damage to the citizens of Bydgoszcz. It had happened at 9 o'clock in the morning, such a sudden accident disturbed the citizens that when the bell was rung, all the citizens were forced to be | The Princes<br>Czartoryski Library<br>in Kraków, sygn. IV<br>1337, Kronika<br>miasta Bydgoszczy<br>od 966 do 1637 roku.        |

|      |                                                                                                                                                                                                                                                    |                                                                                                                                                                                                                                     |                                                                                    |
|------|----------------------------------------------------------------------------------------------------------------------------------------------------------------------------------------------------------------------------------------------------|-------------------------------------------------------------------------------------------------------------------------------------------------------------------------------------------------------------------------------------|------------------------------------------------------------------------------------|
|      | <i>damnum cives sunt experti et in sale duraverat haec aqua ad diluculum, habebat semi ulnae spatium adimplendi superioris inundationis anni 1571.</i>                                                                                             | present to defend the granaries filled with grain, but in some granaries the citizens experienced damage and this water had remained in the salt until dawn, it had half a cubit space to fill the previous flood of the year 1571. |                                                                                    |
| 1598 | <i>Im Winter ist ein ungemeiner harter Frost gewesen so daß man in den Kellern sich nicht mehr bergen mögen und hat biß an Mitt-Fasten des folgenden Jahres gedauert da dann das Weichsel Eiß der Brücken einen grossen Schaden zugefüget hat.</i> | In winter, there was an exceptionally harsh frost, so that one could no longer take shelter in the cellars, and this lasted until mid-Lent of the following year, when the Vistula ice caused great damage to the bridges.          | Zernecke J. H.,<br>Historiae<br>Thoruniensis<br>naufrae<br>tabulae, Thorn<br>1711. |

7

8 Table S3. Archival sources used

9 **Archival materials**

10 Archiwum Państwowe w Gdańsku, Rękopisy elbląskie, sign. 492, 973

11 Archiwum Państwowe w Poznaniu, Akta miasta Poznania, Acta consularia 1494-1507

12 Biblioteka Jagiellońska w Krakowie, Rps Nr. 5358: Żegota

13 Biblioteka Jagiellońska w Krakowie, Cim. 5521, Kalendarz na lata 1534-1551 z zapiskami Marcina Biema z Olkusza  
14 [Calendar for the years 1534-1551 with notes by Marcin Biem from Olkusz]

15 Biblioteka Jagiellońska w Krakowie, Cim. 5526, Kalendarz na lata 1513-1531 z zapiskami Michała z Wiślicy  
16 [Calendar for the years 1513-1531 with notes by Michał of Wiślica]

17 Biblioteka Jagiellońska w Krakowie, Cim. 5527, Kalendarz na lata 1532-1569 z zapiskami Michała z Wiślicy  
18 [Calendar for the years 1532-1569 with notes by Michał of Wiślica]

19 Biblioteka Jagiellońska w Krakowie, Cim. 5528, Kalendarz na lata 1544-1556 z zapiskami Mgra Ravensis i Michała  
20 z Wiślicy [Calendar for the years 1544-1556 with notes Mgr Ravensis and Michał of Wiślica]

21 Biblioteka Jagiellońska w Krakowie, Incun. 2697, Kalendarz na lata 1499-1531 z zapiskami Marcina Biema z Olkusza  
22 [Calendar for the years 1499-1531 with notes by Marcin Biem from Olkusz]

23 Biblioteka Jagiellońska w Krakowie, Rps Nr. 5358, Notaty z kalendarzy dawnych krakowskich XV, XVI, XVII w.,  
24 zebrał Żegota Pauli [Notes from old Krakow calendars from the 15th, 16th and 17th centuries, collected by Żegota  
25 Pauli].

26

27 **Primary sources**

28 Acta officii consistorialis Leopoliensis antiquissima, edidit Guilelmus Rolny, Vol. I (1482 – 1489), Lwów 1927

29 Acta Tomiciana, Vol. 1-13, Posnaniae 1852 – 1915

30 Aelurius G., Glaciographia oder Glaetzische Chronica, das ist gründliche historische Beschreibung der berühmten und  
31 vormen Stadt, ja gantzen Graffschaft Glatz, nach allen vornehmsten Stücken usw., Leipzig 1625

32 Annales Gorlicenses-Supplementum, in: Oskar Schmidt-Reder: Otia Lusatica. Görlitz 1882

33 Bernt Stegmann's Hanseatische Chronik, ed. Th. Hirsch, in: Scriptorum rerum Prussicarum, Vol. 5, hrsg. v. Th. Hirsch,  
34 M. Töppen, E. Strehlke, Leipzig 1874, p. 544-577

35 Bielski M., Kronika wszystkiego świata, Warszawa 1764

36 Carpzw J. B., Analecta Fastorum Zittaviensium etc., Zittau 1716

37 Catalogus abbatum Saganensium, in: Scriptorum rerum Silesiacarum, Vol. 1, ed. Gustav Adolf Stenzel, Breslau 1835,  
38 p. 173-528.

39 Christoph Beyer des ältern Danziger Chronik, ed. Th. Hirsch, w: Scriptorum rerum Prussicarum, Vol. 5, hrsg. v. M.  
40 Hirsch, T. Töppen, E. Strehlke, Leipzig 1874, p. 440-491

41 Christophori Manlii Gorlicensis patricii commentariorum rerum Lusaticarum, in: Scriptorum rerum Lusaticarum antiqui  
42 et recentiores, ed. C.G. Hoffmann, Lipsia et Budissa 1719, p. 73-468

43 Chronica principium Poloniae, in: Scriptorum rerum Silesiacarum, Vol. 1, ed. G. A. Stenzel, Breslau 1835, p. 38-172

44 Chronik Michael Steinbergs, ed. Th. Schönborn, (Schweidnitzer Chronisten des XVI. Jahrhunderts), ed.  
45 Schimmelpfennig, Schönborn, in: Scriptorum rerum Silesiacarum, Vol. 11, Breslau 1878, p. 117-176

46 Curicke R., Der Stadt Dantzig historische Beschreibung, Amsterdam-Dantzic 1688

47 Decius J., De Sigismundi regis temporibus lib. III, Cracoviae 1521

48 Diarium cuiusdam domestici Petri Tomicky episcopi Cracoviensis, ed. W. Kętrzyński, in: Monumenta Poloniae  
49 Historica, Vol. 5, Lwów 1888, p. 897-904

- 50 Diarium des Görlitzer Consul Paul Schneider, ed. E. Schulze, Neues Lausitz. Magazin, Vol. 71, 1895, p. 1-69
- 51 Die älteste Thorner Stadtchronik (1222 – 1528), ed. M. Töppen, Zeitschrift des Westpreussischen. Geschichtsvereins,  
52 Vol. 42, 1900, p. 1-65
- 53 Die Chronik der Stadtschreiber von Posen, ed. A. Warschauer, Posen 1888
- 54 Die Chronik des Johannes Freiberg (1511 – 1560), in: Königsberger Chroniken aus der Zeit Herzogs Albrecht, ed. F.  
55 A. Meckelburg, Königsberg 1965, p. 1-279
- 56 Die Meissner Chronik. Von Erbauung der Stadt, bis zum Jahre 1588, ed. M. Grünewald, Vol. 1, Hayn 1829
- 57 Die mittlere Chronik von Oliva (1356-1545), [w:] Scriptorum Rerum Prussicarum, Bd. 5, ed. Th. Hirsch, M. Töppen,  
58 E. Strehlke, Leipzig 1874, s. 624-647
- 59 Die Thommendorfsche Familienchronik, ed. A. Schimmelpfennig, in: Scriptorum rerum Silesiacarum, Vol. 11, Breslau  
60 1878, p. 1-176
- 61 E codicibus Trzemesznensibus, ed. W. Kętrzyński, in: Monumenta Poloniae historica, Vol. 5, Lwów 1888, p. 967-988
- 62 Eckert R., Die landsberger Stadtschreiber-Chronik, in: Schriften des Vereins für Geschichte der Neumark, Vol. 1,  
63 1893, p. 1-100
- 64 Engel A., Annales Marchiae Brandenburgicae das ist Ordentliche Verzeichnuß und beschreibung der fürnemsten und  
65 gedenckwürdigsten Märckischen Jahrgeschichten und Historien, so sich vom 416. Jahr vor Christi Geburt, bis auff  
66 1596. Jahr im Churfürstenhumb Brandenburg, und dazu gehörenden Landen und Herrschafften, von jahr zu Jahr  
67 begeben und zugetragen haben. Aus vielen glaubwürdigen Scribenten und Büchern, auch aus bewerten urkunden und  
68 vielen alten monumentis, zusammen getragen und beschrieben, Frankfurt a/Oder 1598
- 69 Excerpta ex Nicolai Henelii ab Hennenfeld Chronico Ducatus Monsterbergensis et Territori Francosteinensis, in:  
70 Silesiacarum rerum scriptores, ed. F.W. von Sommersberg, Leipzig 1729, Vol. 1, p. 114-480
- 71 Fibiger M. J., Series et acta magistrorum Wratislaviensium, in: Scriptorum rerum Silesiacarum, Vol. 2, ed. G.A. Stenzel,  
72 Breslau 1839, p. 287-381
- 73 Fincelius J., Wunderzeichen. Warhaftige Beschreibung vnd gründlich Verzeichnus schrecklicher Wunderzeichen die  
74 von Jar ein 1517 bis auff itziges Jahr 1566 geschehen usw., Vol. 1-3, Jena 1556-1562
- 75 Friedeborn P., Historische Beschreibung der Stadt Alten Stettin in Pommern, [...], Das ander Buch, Alten Stettin 1613
- 76 Gassarus A.P., Annales Augstburgenses, in: Scriptorum rerum Germanicarum praecipue Saxoniarum, ed. J.B.  
77 Mencken, Vol. 1, Leipzig 1728, col. 1316-1954

- 78 Hafftitius P., *Microcronicon Marchium*, 1599 (1388 – 1598), in: *Codex Diplomaticus Brandenburgensis*, Vol. 4/1, ed.  
79 A.F. Riedel, Berlin 1862.
- 80 Johann's von Posilge, *Officials von Pomesanien*, *Chronik des Landes Preussen* (von 1360 an, fortgesetzt bis 1419),  
81 ed. E. Strehlke, in: *Scriptores rerum Prussicarum*, Vol. 3, hrsg. v. Th. Hirsch, M. Töppen, E. Strehlke, Leipzig 1866,  
82 s. 70-388.
- 83 Justus W., *Kurtze Beschreibung der Alten und Löblichen Stadt Franckfurt an der Oder usw.*, in: J. C. Beckmann,  
84 *Memoranda Francofurtana notitia universitatis etc.*, Frankfurt a/Oder 1676
- 85 Komoniecki A., *Chronografia albo Dziejopis Żywiecki*, wyd. Stanisław Grodziski i Irena Dwornicka, Żywiec 1987
- 86 Kromer M., *De origine et rebus gestis Polonorum libri XXX*, Basileae 1558
- 87 Kroniki Bernarda Wapowskiego z Radochoniec część ostatnia (1480 – 1535), ed. J. Szujski, in: *Scriptores Rerum*  
88 *Polonicarum*, Vol. 2, Cracoviae 1874
- 89 Lengnich G., *Geschichte der Preussischen Lande, Königlich-Polnnischen Antheils*, Vol. 1 (1526 – 1548), Danzig 1722
- 90 Lengnich G., *Geschichte der Preussischen Lande, Königlich-Polnnischen Antheils*, Vol. 3 (1572 – 1586), Danzig 1724
- 91 Leuthinger N., *Scriptores de rebus Marchiae Brandenburgensis*, Vol. 1-2, Frankfurt-Leipzig 1729
- 92 Magnus J. S., *Historische Beschreibung der Hoch- Reichs- Gräfflichen Promnitzschen Residentz-Stadt Sorau in*  
93 *Niederlausitz, und deroselben Regenten Kirchen- und Regiment-Sachen, wie auch Gelehrten Leuthen und*  
94 *sonderbahren Begebenheiten*, Leipzig 1710
- 95 Martini Meisteri *Annales Gorlicenses ab a. P.C.N. 1131 continuati usque ad a. 1651 etc.*, ed. M. Mylius, in: *Scriptores*  
96 *rerum Lusaticarum pars altera*, ed. C.G. Hoffmann, Vol. 1, pars 2, Leipzig et Bautzen 1719, p. 2-94
- 97 *Matricularum Regni Poloniae Summaria*, ed. Th. Wierzbowski, Vol. 2-5, Warszawa 1907-1919
- 98 *Memoriale Ordinis Fratrum Minorum a fr. Joanne de Komorowo compilatum*, ed. W. Kętrzyński, in: *Monumenta*  
99 *Poloniae Historica*, Vol. 5, Lwów 1888, p. 1-418
- 100 Miechowita Maciej, *Chronica Polonorum*, Cracoviae 1521
- 101 Mikołaj z Szadka and Marcin Glicjusz z Pilzna, *Diariusze profesorów Uniwersytetu Krakowskiego z lat 1555-1591*  
102 *BJ Cim. 8420*, ed. D. Machaj, M. Zdanek, Kraków 2024
- 103 Nakielski S. *Miechovia sive promptuarium antiquitatum monasterii Miechoviensis studio et opera*, Cracoviae 1634

- 104 Namsler D., Ausführlicher Bericht von Wassern und Wasserfluthen und Besonderheit von der zuvor unerhörten  
105 Ergissung des Katzbach, darinnen und Goldberg und an andern benachbarten Orten usw. den: 2 Juni diss 1608  
106 Jahres..., Liegnitz 1608
- 107 Nekrologium des Stifts Kamenz, in: Schlesische Nekrologien, ed. Wattenbach, Zeitschrift des Vereins für Geschichte  
108 und Alterthums Schlesiens", Vol. 4, 1862, p. 313-337
- 109 Paul G., Fragmente einer Chronik von Ebersbach nebst einer Einleitung, geschichtliche Nachrichten über den frühern  
110 Zustand der Umgegend enthaltend, Zittau 1826
- 111 Rocznik Kaspra Perzyńskiego 1410 – 1548, ed. A. Bielowski, in: Monumenta Poloniae Historica, Vol. 3, Lwów 1878,  
112 s. 218-219
- 113 Rocznik Stanisława Naropińskiego 996 – 1550, ed. A. Bielowski, in: Monumenta Poloniae Historica, Vol. 3, Lwów  
114 1878, p. 219-227
- 115 Rocznik Wrocławski (Annalia seu contingentia in civitate Wratislavia) 1418 – 1517, ed. A. Semkowicz, in:  
116 Monumenta Poloniae Historica, Vol. 3, Lwów 1878, p. 734-740
- 117 Rocznika świętokrzyskiego dopełnienie drugie z kodeksu IX, 1492 – 1556, ed. E. Maurer, in: Monumenta Poloniae  
118 Historica, Vol. 3, Lwów 1878, p. 88-118
- 119 Rzączyński G.P. Historia naturalis curiosa regni Poloniae magni ducatus Lituaniae, annexarumque provinciarum in  
120 tractatus XX divisa, Sandomiriae 1721
- 121 Schwarz F., Chronica oder Handbüchlein Danziger Geschichte, gedruckt durch J. Rhode, Danzig 1594, Heimatblätter  
122 des Deutschen Heimatbunds, Vol. 3/3-4, Danzig 1926
- 123 Schweidnitzer Chronik des Wenceslaus Thommerndorf, [w:] Scriptorum rerum Silesiacarum, Bd. 11, Breslau 1878.
- 124 Simon Grunaus preussische Chronik, in: Die preussischen Geschichtsschreiber des 16. Und 17. Jahrhunderts, Vol. 2,  
125 ed. M. Perlbach, Leipzig 1889
- 126 Simon Hüttels Chronik der Stadt Trautenau (1484 – 1601), in: Deutsche Chroniken aus Böhmen, Vol. 2, Prag 1881
- 127 Skalitzky A., Excerpte aus der handschriftlichen Chronik eines Habelschwerdters vom Jahre 1618, in:  
128 Vierteljahresschrift für Geschichte und Heimatskunde der Grafschaft Glatz, Vol. 7, 1887/1888, Habelschwerdt, p. 82-  
129 89, 179-187, 274-283, 344-352
- 130 Sleidani continuati, Vol. 1: Oseam Schadaeum (1555 – 1564), Strasbourg 1624
- 131 Sleidani continuati, Vol. 2 (1564 – 1576), Strasbourg 1625
- 132 Sleidani continuati, Vol. 3 (1576 – 1610), Strasbourg 1625
- 133 Sleidani continuati, Vol. 4 (1611 – 1624), Strasbourg 1625

- 134 Staius J., Memorabilia vom Stadtschreiber Staius (1400 – 1571), in: Codex diplomaticus Brandenburgensis, ed. A.F.  
135 Riedel, Vol. 4/1, Berlin 1862
- 136 Stanislai Rescii Diarum 1583-1589, ed. J. Czubek (Archiwum do dziejów literatury i oświaty w Polsce, Vol. 15, 1 ),  
137 Kraków 1915
- 138 Strehlke F., Strehlke S. Nachrichten über besondere Witterungs-Erscheinungen in Preussen während des 14., 15., 16.  
139 und 17. Jahrhunderts, Altpreussische Monatsschrift, 4 Folge, Vol. 10, 1873, p. 650-660
- 140 Thebesius G., Liegnitzische Jahr-Bücher [...] bis zum Ende des 16. Jahrhunderts, Vol. 1-3, ed. M.G.B. Scharff, Jauer  
141 1733
- 142 Vincentz K.R., Die Goldschmiede-Chronik. Die Erlebnisse der ehrbaren Goldschmiede-Ältesten Martin und  
143 Wolfgang, auch Mag. Peters Vincentz (1480 – 1586), Hannover 1918
- 144 Zebrzydowski A., Andrzeja na Więcborku Zebrzydowskiego, biskupa włocławskiego i krakowskiego korespondencya  
145 z lat 1546 – 1553, ed. W. Wisłocki, Kraków 1878
- 146 Zerneck J.H., Historiae Thorunensis naufragae tabulae, Thorn 1711
- 147 Zerneck J.H., Thornische Chronica, Berlin 1727
- 148
- 149 **Catalogues and Databases**
- 150 Natural disasters in Poland: <https://pth.net.pl/projekty/bazy-danych/kleski-elementarne/do-1795>
- 151 Wyjątki ze źródeł historycznych o nadzwyczajnych zjawiskach hydrologicznych i meteorologicznych na ziemiach  
152 polskich w latach 1601-1920, ed. R. Girguś, Warszawa 2022
- 153 Walawender A., Kronika klęsk elementarnych w Polsce i w krajach sąsiednich w latach 1450-1586. I. Zjawiska  
154 meteorologiczne i pomory (Badania z Dziejów Społecznych i Gospodarczych, nr 10), Lwów 1932.
- 155 Walawender A., Kronika klęsk elementarnych w Polsce i w krajach sąsiednich w latach 1450-1586. II. Zniszczenia  
156 wojenne i pożary (Badania z Dziejów Społecznych i Gospodarczych, nr 11), Lwów 1935.
- 157 Weikinn C. Quellentexte zum Witterungsgeschichte Europas von der Zeitwende bis zum Jahre 1850. Hydrographie,  
158 Vol. 2 (1501 – 1600), Berlin 1960
- 159
- 160 **Secondary works**
- 161 Ambrassat A., Bilder aus Wehlaus Vergangenheit, Wehlau 1898
- 162 Baczo L.A., Geschichte Preussens, Vol. 4, Königsberg 1795

- 163 Bekmann J.H., Historische Beschreibung der Chur und Mark Brandenburg usw., ed. B.L. Bekmann. Vol. 1-2, Berlin  
164 1751-1753
- 165 Bergemann J.G., Beschreibung und Gechichte der Stadt Friedeberg a. Queis, Hirschberg 1829
- 166 Bergemann J.G., Beschreibung und Geschichte von Warmbrunn und seinen Heilquellen, Hirschberg 1830
- 167 Bergemann J.G., Chronik der Stadt Bunzlau, Vol. 1-3, Bunzlau 1829-1830
- 168 Berghaus H.C., Geschichte der Stadt Stettin, der Hauptstadt von Pommern, Vol. 1-2, Berlin-Wriezen 1875-1876
- 169 Bertram F., Das Heimatbuch des Kreises Lauban, Marklissa 1928
- 170 Bielański A.K., Materiały do historii powodzi w dorzeczu Górnej Wisły, Kraków 1997
- 171 Biermann G., Geschichte der Herzogthümer Troppau und Jagerndorf, Teschen 1874
- 172 Boehmer F., Geschichte der Stadt Rügenwalde bis zur Aufhebung der Alten Stadtverteilung (1790), Stettin 1900
- 173 Brand T., Breslauer Chronik, Breslau 1840
- 174 Brandstätter F., Die Weichsel, Marienwerder 1855
- 175 Buschbeck H., Geschichte der Kirchgemeinde Steinkirch, Mittel-Steinkirch 1899
- 176 Ciesielska K., Zakrzewski T., 450 lat toruńskiego Podgórze 1555-2005, Toruń 2005
- 177 Dann E. O., Topographie von Danzig, besonders in physischer und medicinischer Hinsicht, Berlin 1835
- 178 Dormann E. J., Geschichte des Kreises Marienburg nach Quellen und Urkunden, Danzig 1862
- 179 Drożdżik W., Z dziejów Kęt, Kraków 1979
- 180 Ehrich, Chronik der Stadt Neudamm nebst Mittheilungen aus alten Schöppen- und Grundbüchern der Dorfschaften  
181 Wittstock, Nabern, Darmietzel, Zicher, Damm (früher Dorf) und Batzlow, Neudamm 1896
- 182 Eitner, 10 Jahre aus Görlitzens Vergangenheit (1567 – 1577), Neues Lausitzer Magazyn, Vol. 70, 1894, p. 13-20
- 183 Engeli A., Hennig F., Geschichte der Stadt Landsberg an der Warthe von den ältesten Zeiten bis auf die Gegenwart,  
184 Landsberg a/W. 1857
- 185 Engelmann L., Geschichte von Reichenau, Vol. 1-2, Reichenau 1904-1905

- 186 Fischer C. F. E., Geschichte und Beschreibung der schlesischen Fürstenthumshauptstadt Jauer, Vol. 1-2, Jauer 1803-  
187 1804
- 188 Franz R. v., Das ehemalige Amt Marienwerder, 2. Theil: die AmtsniederungZeitschrift des historischen Vereins für  
189 den Regierungsbezirk Marienwerder, Vol. 35, 1897, p. 1-60
- 190 Förster A., Aus Grünbergs Vergangenheit, Grünberg 1900
- 191 Gajewski B., Besko. Wieś nad Wisłokiem, Rzeszów 1996
- 192 Gander K., Geschichte der Stadt Guben usw., Guben 1925
- 193 Gomolcke D., Ausführliche Beschreibung derer grossen Schnee, Eysfahrten, und davon entstandenen erschrecklichen  
194 Wasser-Flutten... in und um die k.u.k. Stadt Breslau, in Schlesien, von deren Erbauung an, biss auf das 1736-ste Jahr,  
195 Breslau 1736
- 196 Gomolcke D., Historische Beschreibung derer grossen Theuerungen, Hunger und Kummerjahre, welche nicht allein  
197 die k.u.k. Stadt Breslau, sondern auch dan gantze Land Schlesien bis auf das 1737 Jahr betroffen, Breslau 1737
- 198 Grabowski A., Groby królów polskich w Krakowie w kościele katedralnym na zamku, Kraków 1835
- 199 Gründer J. G., Chronik der Stadt Lauban, Lauban 1846
- 200 Grünhagen C., Über die Unechtheit der angeblichen Chronik des Briegers Stadtschreibers Blasius Gabel, Zeitschrift  
201 des Vereins für Geschichte und Alterthum Schlesiens, Vol. 9, 1869, p. 346-372
- 202 Hagen T.P., Beschreibung der Stadt Freyenwalde usw., Berlin 1784
- 203 Hartwich Abraham, Geographisch-Historische Landes-Beschreibung derer dreyen im Pohlischen Preussen liegenden  
204 Werdern, als des Dantziger- Elbing- und Marienburgischen, Koenigsberg 1897-1903.
- 205 Heinze C. T. E., Geographisch-statistische-geschichtliche Übersicht des Löwenbergschen Kreises in Schlesien,  
206 Löwenberg 1825
- 207 Hellmann G., Elsner G., Meteorologische Untersuchungen über die Sommerhochwasser der Oder, Berlin 1911
- 208 Hellmann G., Neudrucke von Schriften und Karten über Meteorologie und Erdmagnetismus, Nr. 13: Meteorologische  
209 Beobachtungen vom XIV. bis XVII. Jahrhundert, Berlin 1893-1904
- 210 Hensel J. D., Historisch-topographische Beschreibung der Stadt Hirschberg in Schlesien seit ihrem Ursprunge bis auf  
211 das Jahr 1797, Hirschberg 1797
- 212 Herbst J.K., Chronik der Stadt Hirschberg in Schlesien bis zum Jahre 1847, Hirschberg 1849

- 213 Idzikowski F., Opole. Dzieje miasta do 1863 roku, Opole 2002
- 214 Kociński B., Powodzie na Śląsku Opolskim od XII do XX w., Opole 1997
- 215 Kociński B., Powodzie na Śląsku Opolskim od XII do XX w., Opole 1997
- 216 Koegler J., Chroniken der Grafschaft Glatz, Bd. 1, Glatz 1841
- 217 Koniecki A., Poznań. Dzieje miasta wodą pisane, Poznań 2004
- 218 Kotelko S., W średniowieczu — od początków miasta do 1526 r., in: Świdnica. Zarys monografii miasta, ed. W. Korta,  
219 Wrocław-Świdnica 1995
- 220 Kwak J., Miasta Księstwa Opolsko-Raciborskiego w XVI - XVIII wieku, Opole 1977
- 221 Kögler J., Dokumentierte Geschichte und Beschreibung der Herrschaft und Pfarrei Schönfeld, Vierteljahresschrift für  
222 Geschichte und Heimatskunde der Grafschaft Glatz, Vol. 8, 1888-1889, p. 108-137
- 223 Kögler J., Historische Beschreibung der Herrschaft Niedersteine samt zugehörigen Ortschaften, Vierteljahresschrift für  
224 Geschichte und Heimatskunde der Grafschaft Glatz, 6. Jg., 1886 – 1887, p. 50-64, 140-150, 299-308
- 225 Lippert J., Geschichte der Stadt Trautenau. Beiträge zur Geschichte Bohmen. Abt. III: Ortsgeschichten, Vol. 1, Praha  
226 1863
- 227 Luge J. G., Chronik der Stadt Greiffenberg in Schlesien, Greiffenberg 1861
- 228 Łabęcki H., Górnictwo w Polsce pod względem technicznym, historyczno-statystycznym i prawnym, Vol. 1,  
229 Warszawa 1841
- 230 Łukaszewicz J., Obraz historyczno-statystyczny miasta Poznania, Vol 1-2, Poznań 1838
- 231 Mag. Johannes Hasse, Burgermeister zu Goerlitz, Goerlitzer Rathsannalen 1521-1542, ed. Th. Neumann, in: Scriptorum  
232 Rerum Lusaticarum, Vol. 3 (N.F.), Vol. 3, Goerlitz 1870.
- 233 Matthias G. A., Chronica der Stadt Crossen, ed. C. Rauge, Crossen-Zielenzig 1849
- 234 Meltzer O., Kleine Beiträge zur Chronik von Goldberg und Haynau, Zeitschrift des Vereins für Geschichte und  
235 Alterthums Schlesiens, Vol. 13/1, 1876
- 236 Mengel P.F., Das Oderbruch, Vol. 1-2, Eberwolle 1930-1934
- 237 Minsberg F., Geschichtliche Darstellung der merkwürdigsten Ereignisse in der Fürstenthums Stadt Neisse, Neisse  
238 1834

- 239 Müller C.H.F., Die Denkwürdigkeiten Lähns und seiner beiden Kirchen zur 100-jährigen Jubelfeier der evangelischen  
240 Kirche daselbst, Goldberg 1852
- 241 Musceniusz Jan, Krzysztoporski Jan, Krzysztoporski Stanisław, Dzienniki z XVI w. w druku BJ Cim.8421, ed. J.  
242 Partyka, M. Malicki, Poznań 2009
- 243 Obstfelder von C., Chronik der Stadt Crossen. Von den ältesten Zeiten bis zum Jahre 1845, Crossen a/Oder 1895
- 244 Pescheck C.A., Handbuch der Geschichte von Zittau, Vol. 2, Zittau 1837
- 245 Poetsch C.G., Chronologische Geschichte der grossen Wasserfluthen des Elbstroms seit 1000 und mehr Jahren,  
246 Dresden 1784
- 247 Pol N., Jahrbücher der Stadt Breslau, ed. J.G. Büsching, Vol. 4, Breslau 1823
- 248 Prittwitz, von, B., Über die handschriftlichen Vervollständigungen von Pöls Hemerologium Silesiac Wralislaviense  
249 (15. – 18. Jahrhundert). Zeitschrift des Vereins für Geschichte und Alterthum Schlesiens, Vol. 13/1, 1876, p. 193-242
- 250 Reinhold W., Chronik der Stadt Soldin von der ältesten bis auf neueste Zeit..., Soldin 1846
- 251 Reinhold W., Chronik der Städte Belgrad, Polzin und Schivelbein und der zu beiden Kreisen gehörigen Dörfer,  
252 Schivelbein 1862
- 253 Riemann H.A., Geschichte der Stadt Colberg. Colberg 1873
- 254 Rösler J.T.D., Chronick von Reichenau und den eingepfarrten Ortschaften Lichtenberg, Markersdorf und Hermsdorf,  
255 Zittau 1823
- 256 Rösler J.T.D., Chronick von Reichenau und den eingepfarrten Ortschaften Lichtenberg, Markersdorf und Hermsdorf,  
257 Zittau 1823
- 258 Sahm W., Geschichte der Stadt Friedland (Ostpreussen), Königsberg in Preussen 1913
- 259 Schmidt H. Geschichte der Stadt Grünberg in Schlesien, Grünberg 1922
- 260 Schmidt H., Geschichte der Stadt Grünberg in Schlesien, Grünberg 1922
- 261 Schneider J.C. Chronik der Stadt und Standesherrschaft Forst vor und nach der Vereinigung mit der Standesherrschaft  
262 Pförten, Guben 1846
- 263 Schönwälder K.F., Die Piasten zum Brieg oder Geschichte der Stadt und des Fürstenthums Brieg, Vol. 1, Brieg 1855
- 264 Schönwälder K.F., Geschichtliche Ortsnachrichten von Brieg und seinen Umgebungen, Vol. 1, Brieg 1846
- 265 Skarżyńska K., O tablicach powodziowych na obszarze Krakowa. Przyczynek do dziejów wezbrań Wisły pod  
266 Krakowem - materiały do dziejów geofizyki, Kraków 1961

- 267 Słownik geograficzny królestwa polskiego i innych krajów słowiańskich, ed. F. Sulimierski, B. Chlebowski, W.  
268 Walewski, Vol. 1-16, Warszawa 1880-1902
- 269 Sutorius B.G., Die Geschichte von Löwenberg, Bd. 1-2, Bunzlau 1784-1787
- 270 Środa Śląska. Dzieje miasta wina i skarbów, red. Żerelik R., Wrocław 2006
- 271 Troske F., Geschichte der Stadt Leobschütz, Leobschütz 1892
- 272 Tschirch A., Zeittafel zur Geschichte der Stadt Guben, Neues Lausitz-Magazin, Vol. 46, 1. Abt. Görlitz 1869, p. 1-62
- 273 Turoń B., Pod rządami Habsburgów, [w:] Kamienna Góra. Monografia geograficzno-historyczna miasta i okolic, ed.  
274 Stanisław Michalkiewicz, Wrocław et al. 1986, p. 48-73
- 275 Vogt M., Illustrierte Chronik der Stadt Hirschberg in Schlesien, Hirschberg 1876
- 276 Voigt A., Thorner Denkwürdigkeiten von 1345 – 1547, Mitteilungen des Copernicus-Vereins für Wissenschaft und  
277 Kunst zu Thorn, Vol. 13
- 278 Volkmer F., Geschichte der bedeutendsten Überschwemmungen in der Graffschaft Glatz, Vierteljahresschrift für  
279 Geschichte und Heimatskunde der Grafschaft Glatz, Vol. 4, 1884/1885, p. 123-135
- 280 Wawoczny G., Kataklizmy w dziejach Raciborszczyzny, Racibórz 1998
- 281 Wedekind E.L., Geschichte der Grafschaft Glatz. Chronik der Städte, Flecken, Dörfer, Kolonien, Schlösser, etc. dieser  
282 souverainen Grafschaft von der frühesten Vergangenheit bis auf die Gegenwart, Neurode 1855
- 283 Wernicke E. Chronik der Stadt Bunzlau von den ältesten Zeiten bis zur Gegenwart. Bunzlau 1884
- 284 Wernicke J.E. Geschichte Thorns aus Urkunden, Dokumenten und Handschriften, Vol. 2, Thorn 1842
- 285 Wittig J., Chronik der Stadt Neurode, Neurode 1937
- 286 Worbs J.G., Geschichte der Herrschaften Sorau und Triebel, Sorau 1826
- 287 Wuttke H., Städtebuch des Landes Posen, Leipzig 1877
- 288 Zeller D., Hirschberger Merkwürdigkeiten, Vol. 1, Hirschberg 1720
- 289 Zellner K., Pamiętniki - zdarzenia z końca XVI i początku XVII wieku, Kraków 1835
- 290
- 291 Table S4. Pointer years of *Abies alba*, *Pinus sylvestris* and *Quercus* spp. in Poland in four historical regions in the  
292 16<sup>th</sup> century: „-1” – negative; „1” – positive

| <i>Species</i> | <i>Quercus</i> spp. | <i>Quercus</i> spp. | <i>Quercus</i> spp. | <i>Abies alba</i> | <i>Pinus sylvestris</i> | <i>Pinus sylvestris</i> |
|----------------|---------------------|---------------------|---------------------|-------------------|-------------------------|-------------------------|
| <i>Region</i>  | Greater Poland      | Lower Silesia       | Lesser Poland       | Lesser Poland     | Lesser Poland           | Kuyavian-Pomeranian     |
| <i>Year</i>    |                     |                     |                     |                   |                         |                         |

|      |    |    |   |    |    |    |
|------|----|----|---|----|----|----|
| 1501 |    |    |   |    |    |    |
| 1502 |    |    |   |    |    |    |
| 1503 |    |    |   |    |    |    |
| 1504 |    |    |   |    |    |    |
| 1505 |    |    |   |    |    |    |
| 1506 |    |    |   |    |    |    |
| 1507 |    |    |   |    |    |    |
| 1508 |    |    |   |    |    |    |
| 1509 |    |    |   | -1 |    |    |
| 1510 |    |    |   |    |    |    |
| 1511 |    |    |   |    | -1 |    |
| 1512 |    |    |   |    |    |    |
| 1513 |    |    |   |    |    |    |
| 1514 |    |    |   | -1 |    |    |
| 1515 |    |    |   |    |    |    |
| 1516 |    |    |   |    |    |    |
| 1517 |    |    |   |    |    |    |
| 1518 |    |    |   |    |    | -1 |
| 1519 |    | -1 |   |    |    |    |
| 1520 |    |    |   |    |    |    |
| 1521 | 1  | 1  | 1 |    |    | 1  |
| 1522 |    |    |   | -1 |    |    |
| 1523 | -1 |    |   |    |    | -1 |
| 1524 |    |    |   |    |    |    |
| 1525 | -1 |    |   |    | -1 |    |
| 1526 |    | 1  | 1 |    | 1  |    |
| 1527 | -1 |    |   |    |    |    |
| 1528 |    |    |   |    |    |    |
| 1529 |    |    |   |    |    | 1  |
| 1530 |    |    |   |    |    |    |
| 1531 |    |    |   |    |    |    |
| 1532 |    |    |   |    |    |    |
| 1533 | 1  | 1  | 1 |    | 1  |    |
| 1534 |    |    |   |    | -1 |    |
| 1535 |    |    |   |    |    |    |
| 1536 |    |    |   |    |    |    |
| 1537 | 1  |    |   | -1 |    |    |
| 1538 | -1 | -1 |   |    | -1 |    |
| 1539 | 1  | 1  |   |    |    |    |
| 1540 |    |    |   | -1 |    |    |
| 1541 |    |    |   |    |    |    |
| 1542 |    | 1  |   |    |    |    |
| 1543 |    |    |   |    |    |    |
| 1544 |    |    |   |    |    |    |
| 1545 |    | 1  |   |    |    |    |

|      |    |    |    |    |    |    |
|------|----|----|----|----|----|----|
| 1546 |    |    |    |    |    |    |
| 1547 | -1 |    |    |    |    |    |
| 1548 |    |    |    | 1  |    |    |
| 1549 |    |    |    |    |    |    |
| 1550 |    |    |    |    |    |    |
| 1551 |    |    |    |    |    |    |
| 1552 |    |    |    |    |    |    |
| 1553 |    |    |    |    |    |    |
| 1554 |    |    |    |    |    |    |
| 1555 |    |    |    |    |    |    |
| 1556 |    |    |    |    |    |    |
| 1557 |    |    |    | -1 | -1 | -1 |
| 1558 |    | 1  |    |    | 1  |    |
| 1559 |    |    |    |    |    |    |
| 1560 |    |    |    |    |    |    |
| 1561 |    |    |    |    |    |    |
| 1562 |    |    | -1 |    |    |    |
| 1563 |    |    |    |    |    |    |
| 1564 |    | 1  |    |    |    |    |
| 1565 |    |    |    |    |    |    |
| 1566 |    |    |    |    |    |    |
| 1567 |    |    |    |    |    |    |
| 1568 |    |    |    |    |    |    |
| 1569 |    |    | 1  |    |    |    |
| 1570 |    | 1  | 1  |    |    |    |
| 1571 |    |    | -1 |    |    |    |
| 1572 |    |    |    |    |    |    |
| 1573 |    |    | -1 | -1 |    |    |
| 1574 |    |    |    |    |    |    |
| 1575 |    |    |    | -1 | -1 |    |
| 1576 |    |    |    |    | 1  | 1  |
| 1577 |    |    |    |    |    |    |
| 1578 |    |    | 1  |    |    |    |
| 1579 |    |    |    | 1  |    |    |
| 1580 |    | -1 |    |    |    |    |
| 1581 |    |    |    |    |    |    |
| 1582 |    |    |    |    |    |    |
| 1583 |    |    |    |    |    |    |
| 1584 |    |    |    |    |    |    |
| 1585 |    |    |    |    |    |    |
| 1586 |    |    |    |    |    |    |
| 1587 |    |    |    |    |    |    |
| 1588 |    | -1 |    |    |    |    |
| 1589 |    |    | -1 |    |    |    |
| 1590 |    |    |    |    | 1  |    |

|      |  |    |  |    |    |    |
|------|--|----|--|----|----|----|
| 1591 |  |    |  |    |    |    |
| 1592 |  |    |  | 1  |    |    |
| 1593 |  |    |  | -1 | -1 |    |
| 1594 |  |    |  | 1  |    |    |
| 1595 |  | -1 |  | -1 |    |    |
| 1596 |  |    |  | 1  |    |    |
| 1597 |  |    |  |    |    | -1 |
| 1598 |  |    |  |    |    |    |
| 1599 |  |    |  |    |    |    |
| 1600 |  |    |  |    |    |    |

293

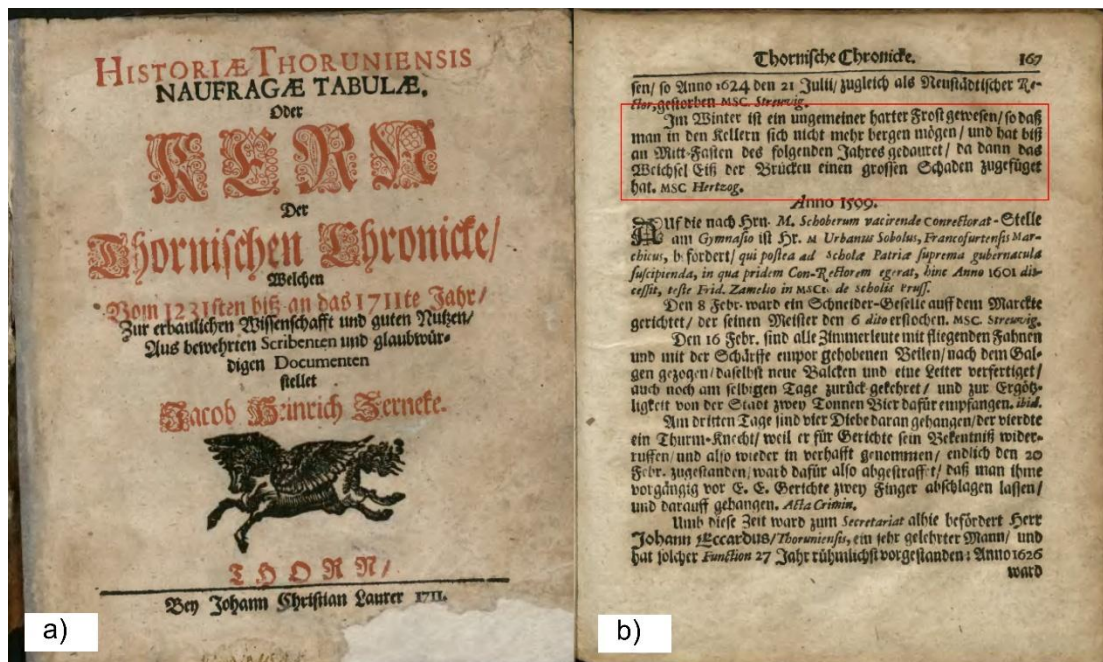

294

295 Fig. S1. Example of a documentary source describing harsh weather conditions in winter 1598 in Toruń and their  
 296 influence on the Vistula river (source: Zernecke J. H., *Historiae Thoruniensis naufragae tabulae*, Thorn 1711).

297 Key: a – title page; b – weather note, see also the last weather note in Table S2 for English translation. Copies taken from Kujawsko-  
 298 Pomorska Biblioteka Cyfrowa ([https://kpbc.umk.pl/publication/20358/edition/45669/historiae-thoruniensis-naufragae-tabulae-oder-kern-der-thornischen-chronicke-welchen-vom-1231-sten-bisz-an-das-1711-te-jahr-zur-erbaulichen-wissenschaft-und-guten-nutzen-aus-bewehrten-scribenten-und-glaubwürdigen-documenten-stellet-zernecke-jacob-heinrich-1672-1741?utm\\_source=chatgpt.com](https://kpbc.umk.pl/publication/20358/edition/45669/historiae-thoruniensis-naufragae-tabulae-oder-kern-der-thornischen-chronicke-welchen-vom-1231-sten-bisz-an-das-1711-te-jahr-zur-erbaulichen-wissenschaft-und-guten-nutzen-aus-bewehrten-scribenten-und-glaubwürdigen-documenten-stellet-zernecke-jacob-heinrich-1672-1741?utm_source=chatgpt.com))

301

302

303

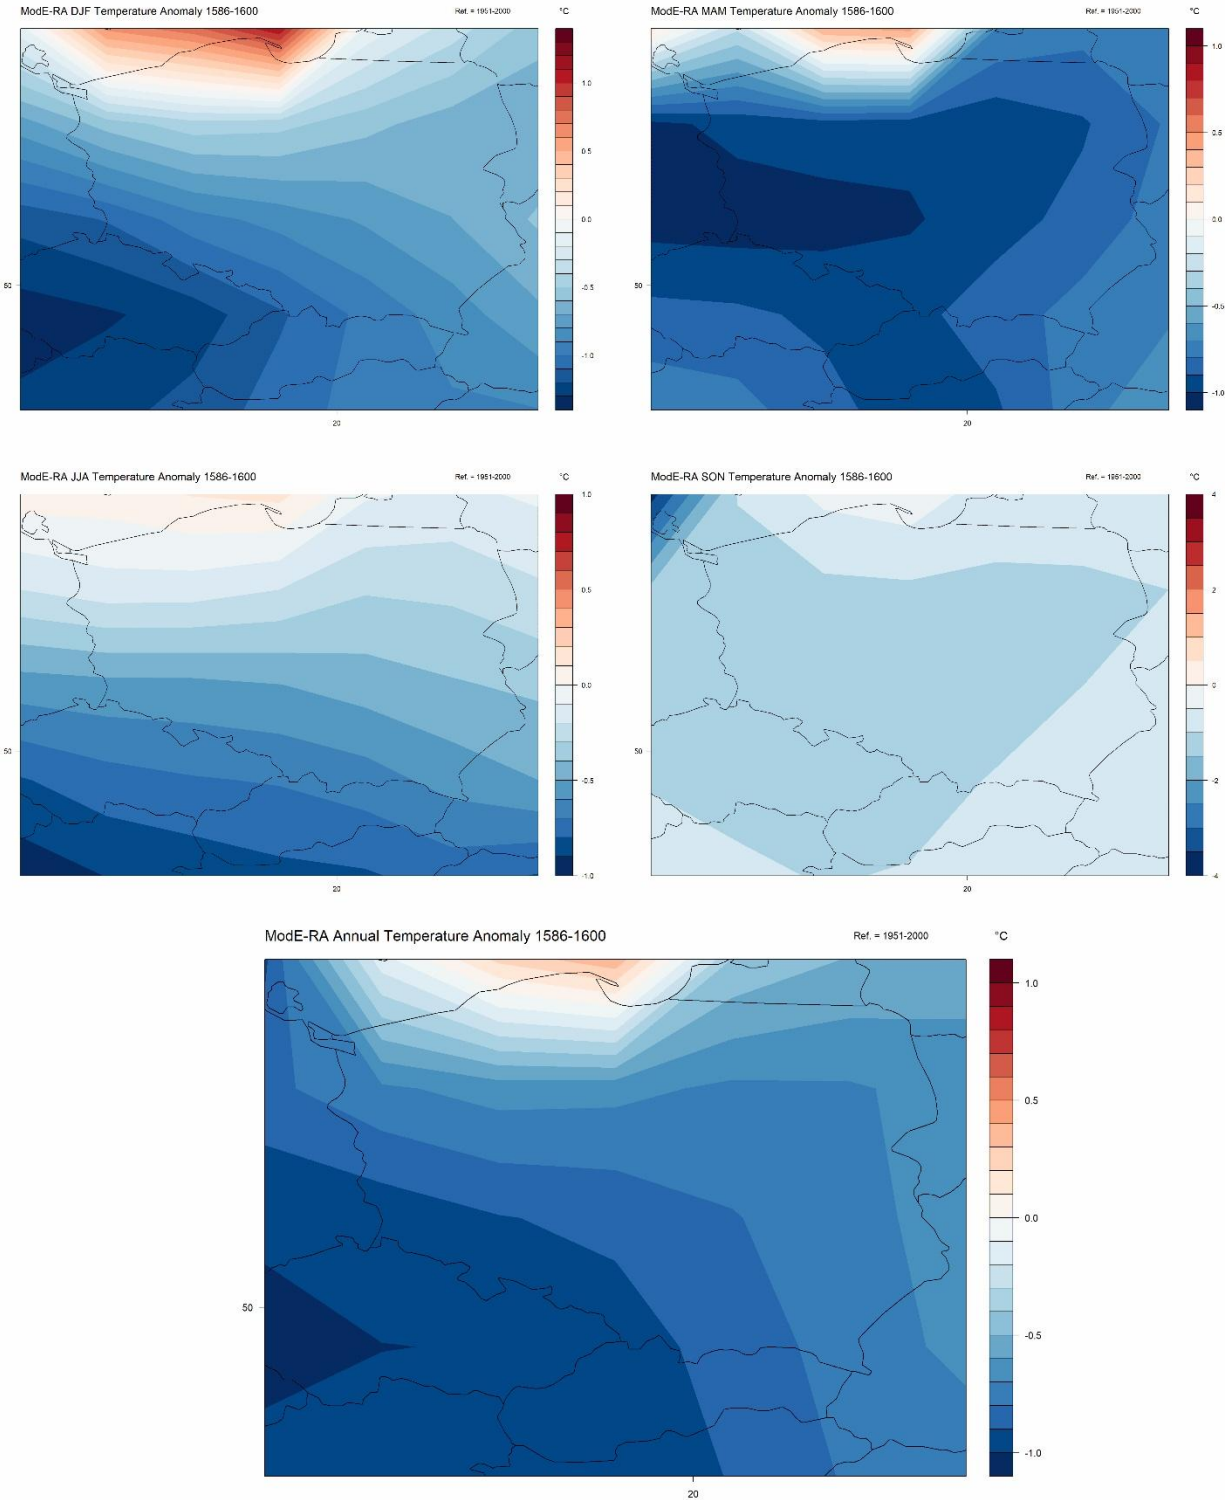

304

305 Fig. S2. Spatial distribution of seasonal and annual mean anomalies of air temperature in Poland in the period 1586–  
 306 1600 based on ModE-RA data (after Valler et al., 2024).

307
